# Supplementary material for: Cancer incidence in a cohort of asbestos-exposed workers undergoing health surveillance
Source: Springer Nature journal article supplement (doi:10.1007/s00420-018-1326-3), 2018-06-05
Supplement: MOESM1 [file 15821256]

**Supplemental Material**

**Supplemental Table 1. Standardize Incidence Ratio (SIR) for all cancers, by calendar year. Observed (O) and expected (E) incident cases, SIR with 95% confidence interval (95%CI). Follow-up period 1995-2009.**

|  |  | **FVG Standard Rates 1** | | |
| --- | --- | --- | --- | --- |
| **Calendar year** | **O** | **E** | **SIR** | **95%CI** |
| 1995 | 2 | 3.06 | 0.65 | 0.08-2.36 |
| 1996 | 5 | 3.77 | 1.32 | 0.43-3.09 |
| 1997 | 3 | 4.87 | 0.62 | 0.13-1.80 |
| 1998 | 8 | 6.37 | 1.26 | 0.54-2.47 |
| 1999 | 7 | 7.41 | 0.94 | 0.38-1.94 |
| 2000 | 10 | 9.46 | 1.06 | 0.51-1.95 |
| 2001 | 20 | 12.85 | 1.56 | 0.95-2.40 |
| 2002 | 22 | 18.10 | 1.22 | 0.76-1.84 |
| 2003 | 24 | 23.14 | 1.04 | 0.66-1.55 |
| 2004 | 30 | 28.94 | 1.04 | 0.70-1.48 |
| 2005 | 42 | 31.55 | 1.33 | 0.95-1.81 |
| 2006 | 35 | 34.30 | 1.02 | 0.71-1.42 |
| 2007 | 48 | 36.38 | 1.32 | 0.98-1.74 |
| 2008 | 38 | 38.31 | 0.99 | 0.71-1.35 |
| 2009 | 43 | 38.82 | 1.11 | 0.81-1.48 |

1 Regional Standard Rate: age-specific incidence rates of FVG for years 1995-2007, provided by the Associazione Italiana Registri Tumori (AIRTUM). For years 2008 and 2009, standard rates were not available: we used the available rates of the closest year: for years 2008 and 2009 we used the rates of year 2007. Cohort included 2,488 subjects, for 26,415.77 total person-years

**Supplemental Table 2. Standardize Incidence Ratio (SIR) for cancer of trachea, bronchus and lung, by calendar year. Observed (O) and expected (E) incident cases, SIR with 95% confidence interval (95%CI). Folow-up period 1995-2009.**

|  |  | **FVG Standard Rates 1** | | |
| --- | --- | --- | --- | --- |
| **Calendar year** | **O** | **E** | **SIR** | **95%CI** |
| 1995 | - | 0.56 | - | - |
| 1996 | - | 0.68 | - | - |
| 1997 | 1 | 0.83 | 1.20 | 0.03-6.68 |
| 1998 | - | 1.03 | - | - |
| 1999 | 1 | 1.21 | 0.82 | 0.02-4.59 |
| 2000 | 3 | 1.37 | 2.19 | 0.45-6.40 |
| 2001 | 4 | 1.82 | 2.20 | 0.60-5.63 |
| 2002 | 9 | 2.60 | 3.46 | 1.59-6.58 |
| 2003 | 5 | 3.29 | 1.52 | 0.49-3.54 |
| 2004 | 7 | 4.06 | 1.72 | 0.69-3.55 |
| 2005 | 6 | 4.41 | 1.36 | 0.44-2.97 |
| 2006 | 5 | 4.57 | 1.09 | 0.35-2.55 |
| 2007 | 7 | 4.60 | 1.52 | 0.61-3.14 |
| 2008 | 7 | 4.93 | 1.42 | 0.57-2.92 |
| 2009 | 11 | 5.10 | 2.16 | 1.08-3.86 |

1 Regional Standard Rate: age-specific incidence rates of FVG for years 1995-2007, provided by the Associazione Italiana Registri Tumori (AIRTUM). For the years 2008 and 2009, standard rates were not available: we used the available rates of the closest year: for years 2008 and 2009 we used the rates of year 2007. Cohort included 2,488 subjects, for 20,388.18 total person-years.

**Supplemental Table 3. Standardize Incidence Ratio (SIR) for mesothelioma, by calendar year. Observed (O) and expected (E) incident cases, SIR with 95% confidence interval (95%CI). Folow-up period 1995-2009.**

|  |  | **FVG Standard Rates 1** | | |
| --- | --- | --- | --- | --- |
| **Calendar year** | **O** | **E** | **SIR** | **95%CI** |
| 1995 | 1 | 0.03 | 34.84 | 0.88-194.08 |
| 1996 | . | 0.03 | . | . |
| 1997 | . | 0.04 | . | . |
| 1998 | 1 | 0.08 | 12.97 | 0.33-72.24 |
| 1999 | 2 | 0.08 | 25.88 | 3.13-93.42 |
| 2000 | . | 0.13 | . | . |
| 2001 | 4 | 0.17 | 23.96 | 6.52-61.33 |
| 2002 | 1 | 0.18 | 5.48 | 0.14-30.54 |
| 2003 | 1 | 0.23 | 4.34 | 0.11-24.19 |
| 2004 | 1 | 0.26 | 3.91 | 0.10-21.77 |
| 2005 | 5 | 0.40 | 12.42 | 4.02-28.94 |
| 2006 | 2 | 0.44 | 4.51 | 0.55-16.28 |
| 2007 | 7 | 0.42 | 16.49 | 6.61-33.96 |
| 2008 | 2 | 0.45 | 4.45 | 0.54-16.05 |
| 2009 | 3 | 0.46 | 6.54 | 1.35-19.09 |

1 Regional Standard Rate: age-specific incidence rates of FVG for years 1995-2007, provided by the Associazione Italiana Registri Tumori (AIRTUM). For the years 2008 and 2009, standard rates were not available: we used the available rates of the closest year: for years 2008 and 2009 we used the rates of year 2007. Cohort included 2,488 subjects for 19,514.12 total person-years.

**Supplemental table 4. Poisson models estimating Incidence Rate Ratios (IRR) for mesothelioma and 95% Confidence Interval (95% CI). Follow-up period 1995-2009.**

|  | | |  |  |  |  |  |  | **Univariate Analysis** | | | |  | **Bivariate Analysis 1** | | | |  | **Multivariate Analysis 2** | | | |
| --- | --- | --- | --- | --- | --- | --- | --- | --- | --- | --- | --- | --- | --- | --- | --- | --- | --- | --- | --- | --- | --- | --- |
| **Explanatory variables** | | |  | **Category** |  | ***N* (%) of events** | ***N* (%) of**  **no events** |  | **AIC 3** | **IRR** | **95%CI** | |  | **AIC 3** | **IRR** | **95%CI** | |  | **AIC3** | **IRR** | **95%CI** | |
|  | | |  |  |  |  |  |  |  |  |  |  |  |  |  |  |  |  |  |  |  |  |
|  |  | Industrial sector 4 |  | Other |  | 6 (20.0) | 726 (29.5) |  | 385.04 | 1 | -- | -- |  | 376.48 | 1 | -- | -- |  | 378.48 | 1 | -- | -- |
|  |  |  | Shipbuilding |  | 23 (76.7) | 1,717 (69.9) |  | 1.43 | 0.58 | 3.50 |  | 1.29 | 0.52 | 3.17 |  | 0.95 | 0.38 | 2.39 |
|  |  | Smoking habits |  | Never |  | 10 (33.3) | 931 (37.9) |  | 399.44 | 1 | -- | -- |  | 389.67 | 1 | -- | -- |  | 1 | -- | -- |
|  |  |  | Former |  | 4 (13.3) | 260 (10.6) |  | 2.19 | 0.69 | 6.97 |  | 1.87 | 0.58 | 5.96 |  | 1.84 | 0.58 | 5.91 |
|  |  |  | Current |  | 16 (53.4) | 1,267 (51.5) |  | 1.01 | 0.46 | 2.23 |  | 1.16 | 0.53 | 2.56 |  | 1.04 | 0.47 | 2.33 |
|  |  | Asbestos exposure level |  | Low |  | 1 (3.3) | 476 (19.3) |  | 389.57 | 1 | -- | -- |  | 382.56 | 1 | -- | -- |  | 1 | -- | -- |
|  |  |  | Moderate |  | 20 (66.7) | 1,671 (68.0) |  | 6.54 | 0.88 | 48.75 |  | 4.82 | 0.64 | 36.22 |  | 4.71 | 0.61 | 36.67 |
|  |  |  | High |  | 9 (30.0) | 311 (12.7) |  | 14.24 | 1.80 | 112.43 |  | 10.09 | 1.26 | 80.72 |  | 8.64 | 1.01 | 74.31 |
|  | Age at start of follow up 5 |  |  | | | |  | 386.67 | 1.06 | 1.03 | 1.10 |  | -- | -- | -- | -- |  | 1.04 | 1.00 | 1.09 |
|  |  |  |  |  |
| Years of asbestos exposure 6 | | |  |  |  |  |  |  | 388.65 | 1.75 | 1.24 | 2.47 |  | 386.88 | 1.32 | 0.87 | 2.02 |  | 1.13 | 0.74 | 1.73 |

1 Adjusted for age at start of follow-up.

2 Mutually adjusted for industrial sector, smoking habits, exposure level, age at start of follow-up and number of years of exposure to asbestos.

3 Akaike's Information Criterion.

4 Missing info for 1 case (3.3%) and 15 non-cases (0.6%).

5 IRRwas estimate with ‘age at start of follow-up’ in continuous mode

6 IRR was estimated each 10 years.
